# Supplementary material for: B-Cell-Activating Factor Depletion Ameliorates Aging-Dependent Insulin Resistance via Enhancement of Thermogenesis in Adipose Tissues
Source: PubMed Central journal article supplement (PMC7404107; doi:10.3390/ijms21145121), 2020-07-20
Supplement: ijms-21-05121-s001.pdf [file ijms-21-05121-s001.pdf]

Supplementary Information

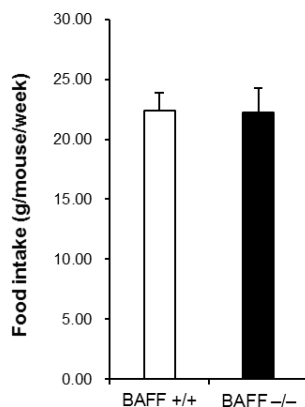

**Figure S1.** There was no significant difference in food intake between aged BAFF<sup>-/-</sup> mice and their wild-type controls.

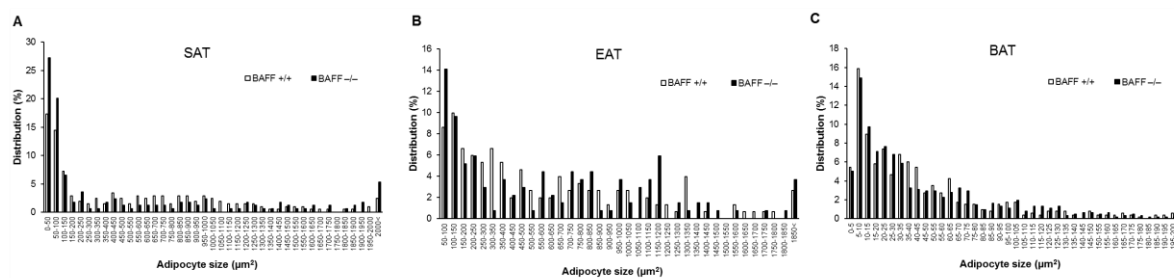

**Figure S2.** There was no significant difference in adipocyte hypertrophy between aged BAFF<sup>-/-</sup> mice and their wild-type controls.

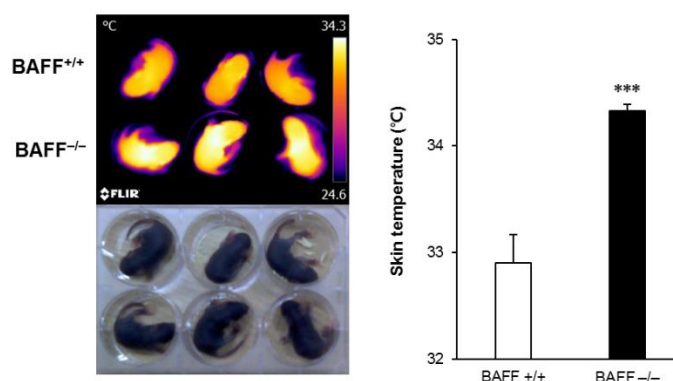

**Figure S3.** Skin body temperature of BAFF<sup>-/-</sup> and wild-type mice pups 8 days after birth.

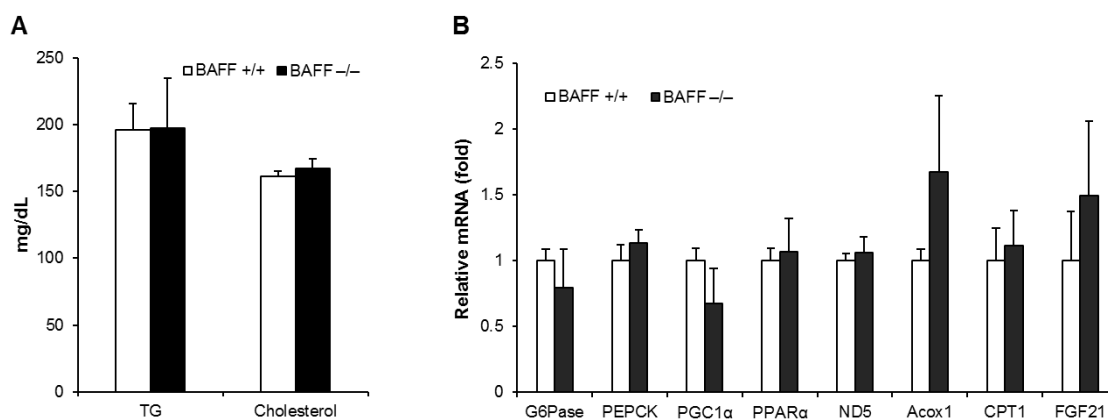

**Figure S4.** There were no significant differences in blood lipid concentration and expression level of genes related to glucose and lipid metabolism between aged BAFF<sup>-/-</sup> mice and their wild-type controls.

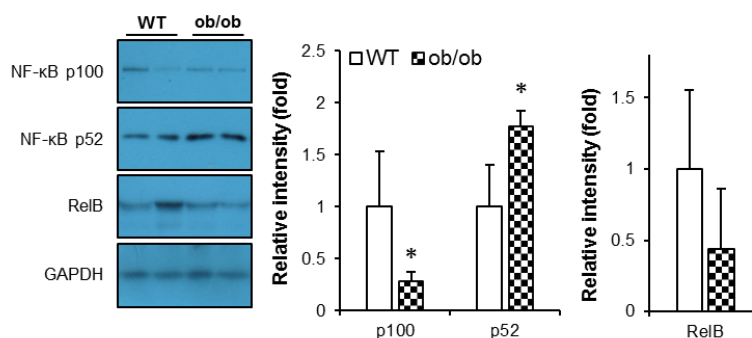

**Figure S5.** NF- $\kappa$ B signaling in subcutaneous adipose tissue of ob/ob mice.

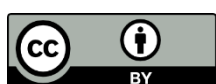

© 2020 by the authors. Submitted for possible open access publication under the terms and conditions of the Creative Commons Attribution (CC BY) license (<http://creativecommons.org/licenses/by/4.0/>).
